# Supplementary material for: The Effect of Mealworm Frass on the Chemical and Microbiological Properties of Horticultural Peat in an Incubation Experiment
Source: MDPI journal article supplement (doi:10.3390/ijerph20010021), 2022-12-20
Supplement: s1 [file s1]

**Table S1.** Selected chemical properties of mealworm (*Tenebrio molitor* L.) frass and deacidified peat.

| Parameter                                                  | Frass  | Deacidified peat |
|------------------------------------------------------------|--------|------------------|
| pH (distilled H <sub>2</sub> O)                            | 5.60   | 5.70             |
| EC (mS cm <sup>-1</sup> )                                  | 6.92   | 0.16             |
| C (g kg <sup>-1</sup> DM)                                  | 388.10 | 457.25           |
| N-total (g kg <sup>-1</sup> DM)                            | 38.00  | 14.69            |
| P (g kg <sup>-1</sup> DM)*; P (mg dm <sup>-3</sup> DM)**   | 14.70  | 25.90            |
| K (g kg <sup>-1</sup> DM)*; K (mg dm <sup>-3</sup> DM)**   | 19.70  | 75.41            |
| Mg (g kg <sup>-1</sup> DM)*; Mg (mg dm <sup>-3</sup> DM)** | 4.27   | 69.35            |

\* – total nutrient content (P, K and Mg) in frass; \*\* – content of available nutrients (P, K and Mg) in deacidified peat

**Table S2.** Quantitative Polymerase Chain Reaction Set-up.

| Target gene                             | Primer name                                            | Set-up                                                                                                                                                                                                                                                                                       | Reference                                     |
|-----------------------------------------|--------------------------------------------------------|----------------------------------------------------------------------------------------------------------------------------------------------------------------------------------------------------------------------------------------------------------------------------------------------|-----------------------------------------------|
| Bacterial load                          | BAC338F<br>BAC805R<br>BAC516F<br>(probe)               | Initial denaturation at 95°C for 10 min, followed by 42 cycles at 95°C for 15 s and 60°C for 1 min.                                                                                                                                                                                          | Yu et al. [31]                                |
| <i>Clostridium</i> spp.                 | CI-F1<br>CI-R2<br>Probe-I (probe)                      | Initial denaturation at 95°C for 10 min, followed by 45 cycles at 95°C for 20 s, at 63°C for 30 s, and at 72°C for 45 s.                                                                                                                                                                     | Song et al. [32]                              |
| <i>Pseudomonas</i> spp.                 | B2BF<br>B2BR3                                          | Initial denaturation at 95°C for 30 s, followed by 40 cycles with a 5-s denaturation step at 95°C and a 34-s elongation/extension step at 60°C, and ending with a melt curve analysis at 95°C for 15 s, 60°C for 1 min, and 95°C for 15 s.                                                   | Hu et al. [33]                                |
| Fungal load                             | FungiQuant-F<br>FungiQuant-R<br>FungiQuant-Prb (probe) | UNG treatment at 50°C for 3 min, initial denaturation at 95°C for 10 min, followed by 50 cycles at 95°C for 15 s and 65°C for 1 min.                                                                                                                                                         | Liu et al. [34]                               |
| <i>Bacillus</i> spp.                    | 16SBACF<br>16SBACR                                     | Initial denaturation at 95°C for 10 min, followed by 45 cycles at 95°C for 15 s, at 58°C for 55 s, and at 72°C for 30 s. Melting curve analyses were performed as follows: denaturing step at 95°C for 15 s, annealing at 60°C for 1 min, and melting in steps of 0.3°C up to 95°C for 15 s. | Mora et al. [35]                              |
| Ammonium monooxygenase ( <i>amoA</i> )  | amoA-1F<br>amoA-2R                                     | Initial denaturation at 95°C for 10 min, followed by 40 cycles at 95°C for 30s, 55°C for 30 s, and 72°C for 45 s.                                                                                                                                                                            | Rotthauwe et al. [36]                         |
| Nitrogenase reductase ( <i>nifH</i> )   | nifH-F<br>nifH-Rb                                      | Initial denaturation at 95°C for 10 min, followed by 40 cycles: at 95°C for 15 s, at 60°C for 30 s, and 72°C for 40 s.                                                                                                                                                                       | Rösch and Bothe [37]                          |
| Nitrite reductase ( <i>nirS</i> )       | nirS cd3AF<br>nirS R3cd                                | Initial denaturation at 95°C for 10 min, followed by 40 cycles: at 95°C for 15 s, at 58°C for 30 s, and 72°C for 40 s.                                                                                                                                                                       | Michotey et al. [38],<br>Throbäck et al. [39] |
| Nitrous oxide reductase ( <i>nosZ</i> ) | nosZ-F<br>nosZ-R                                       | Initial denaturation at 95°C for 10 min, followed by 40 cycles: at 95°C for 15 s, at 62°C for 30 s, and 72°C for 40 s.                                                                                                                                                                       | Kloos et al. [40]<br>Throbäck et al. [39]     |
| Urease ( <i>ureC</i> )                  | ureC1F<br>ureC2R                                       | Initial denaturation at 95°C for 10 min, followed by 40 cycles: at 95°C for 15 s, at 60°C for 1 min, and 72°C for 2 min.                                                                                                                                                                     | Koper et al. [41]                             |
